# Supplementary material
Source: PubMed Central journal article supplement (PMC5350053)

Figure 1

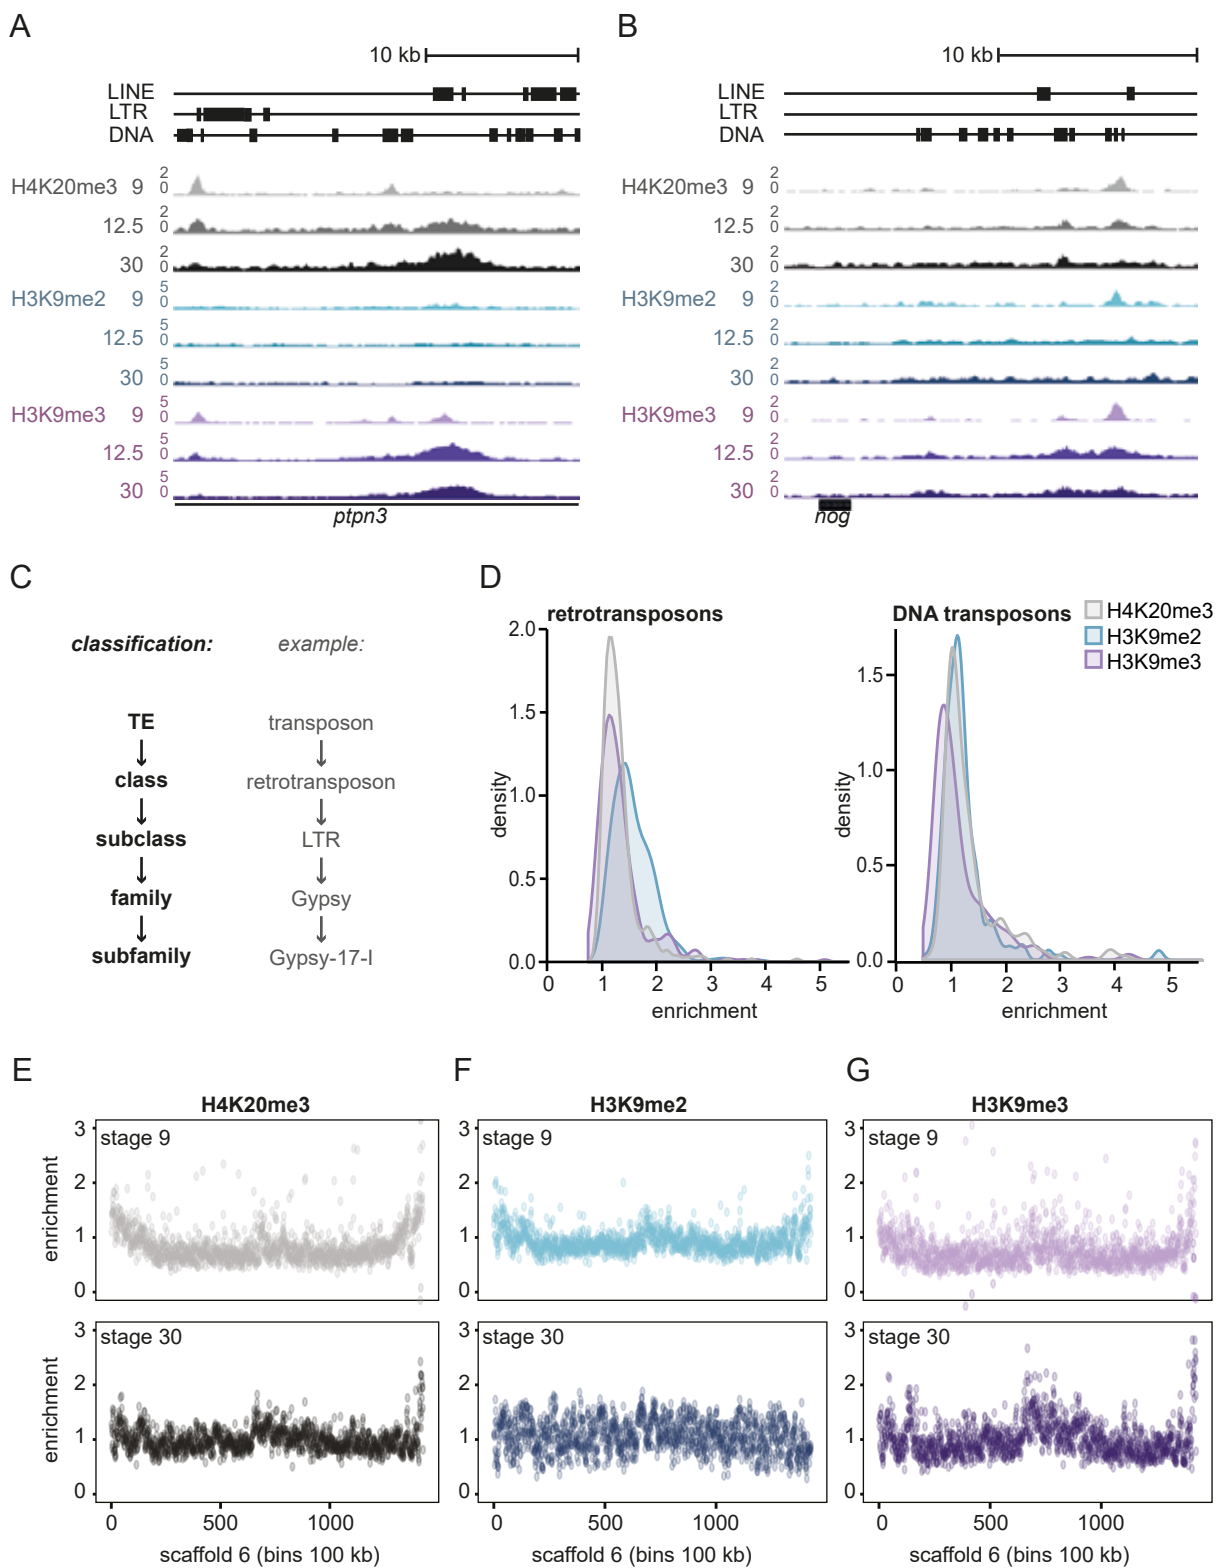

Figure 2

A

retrotransposons

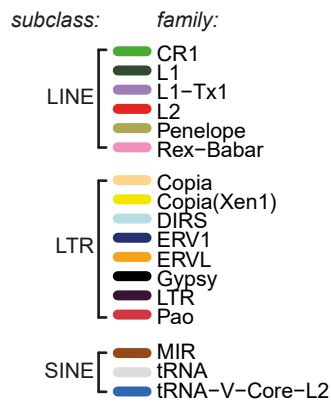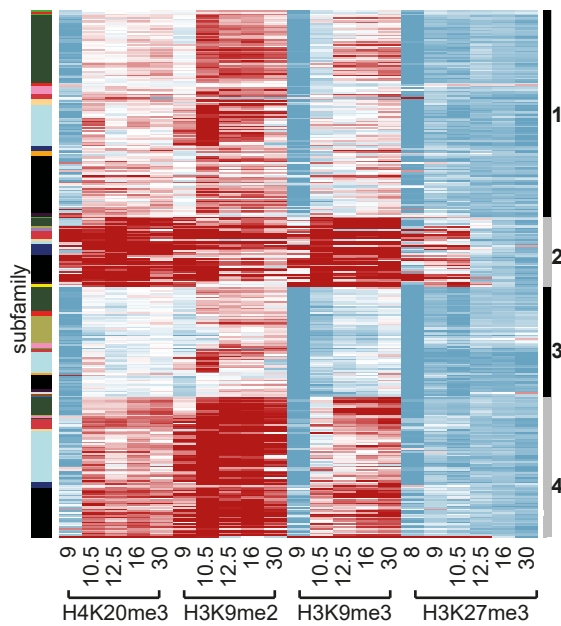

B

DNA transposons

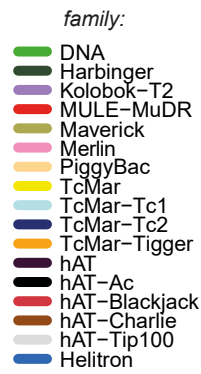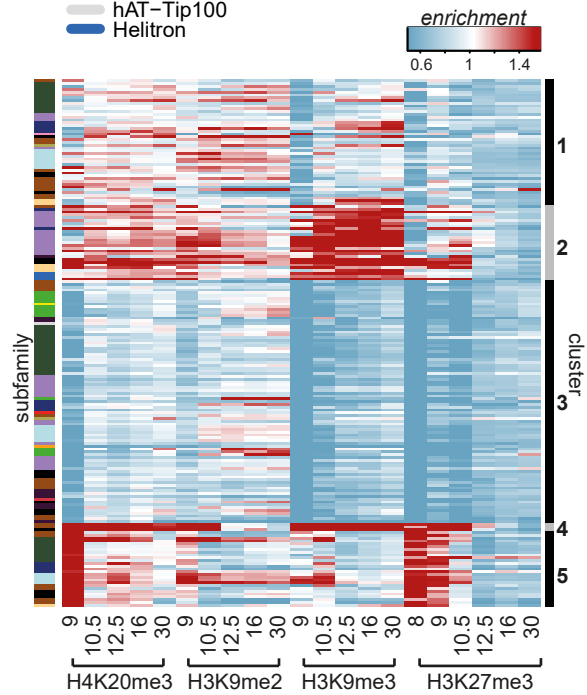

C

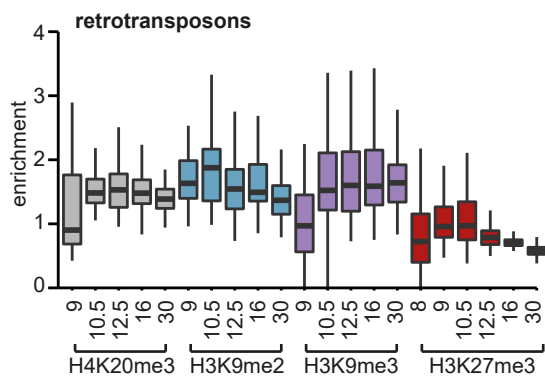

D

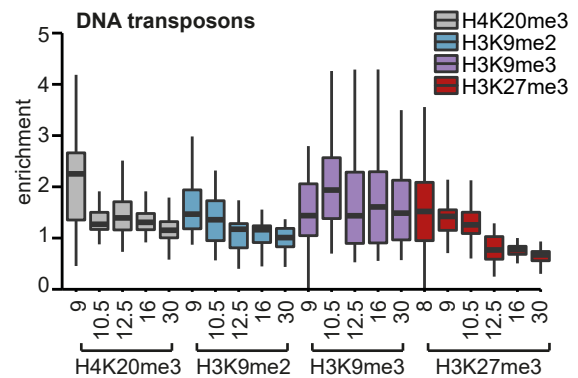

Figure 3

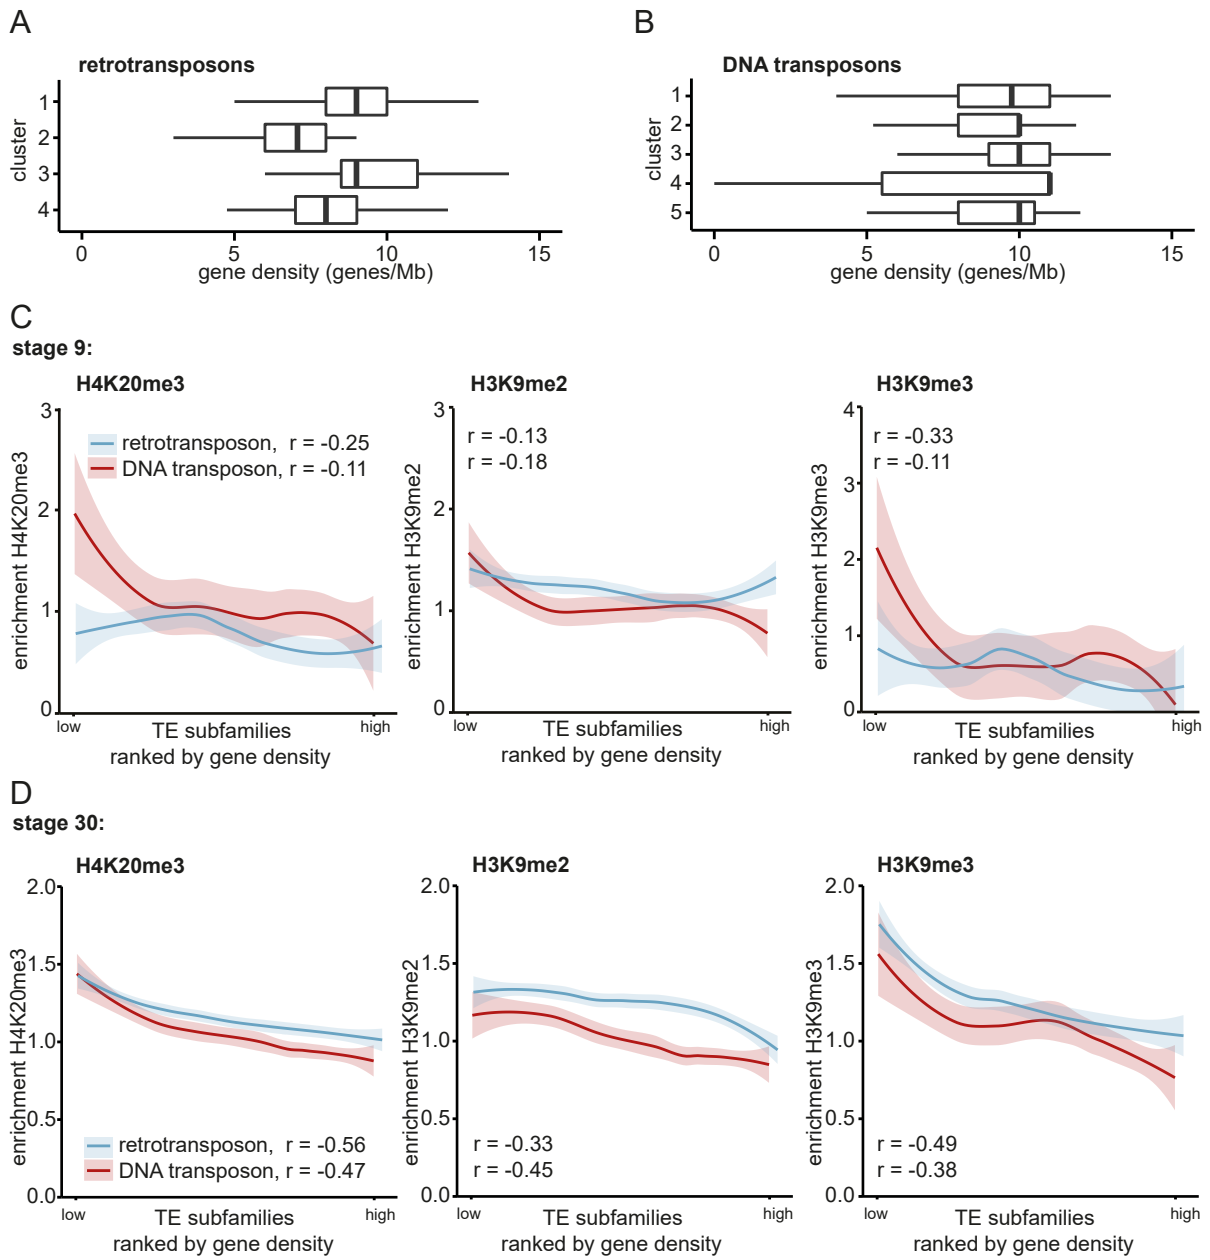

Figure 4

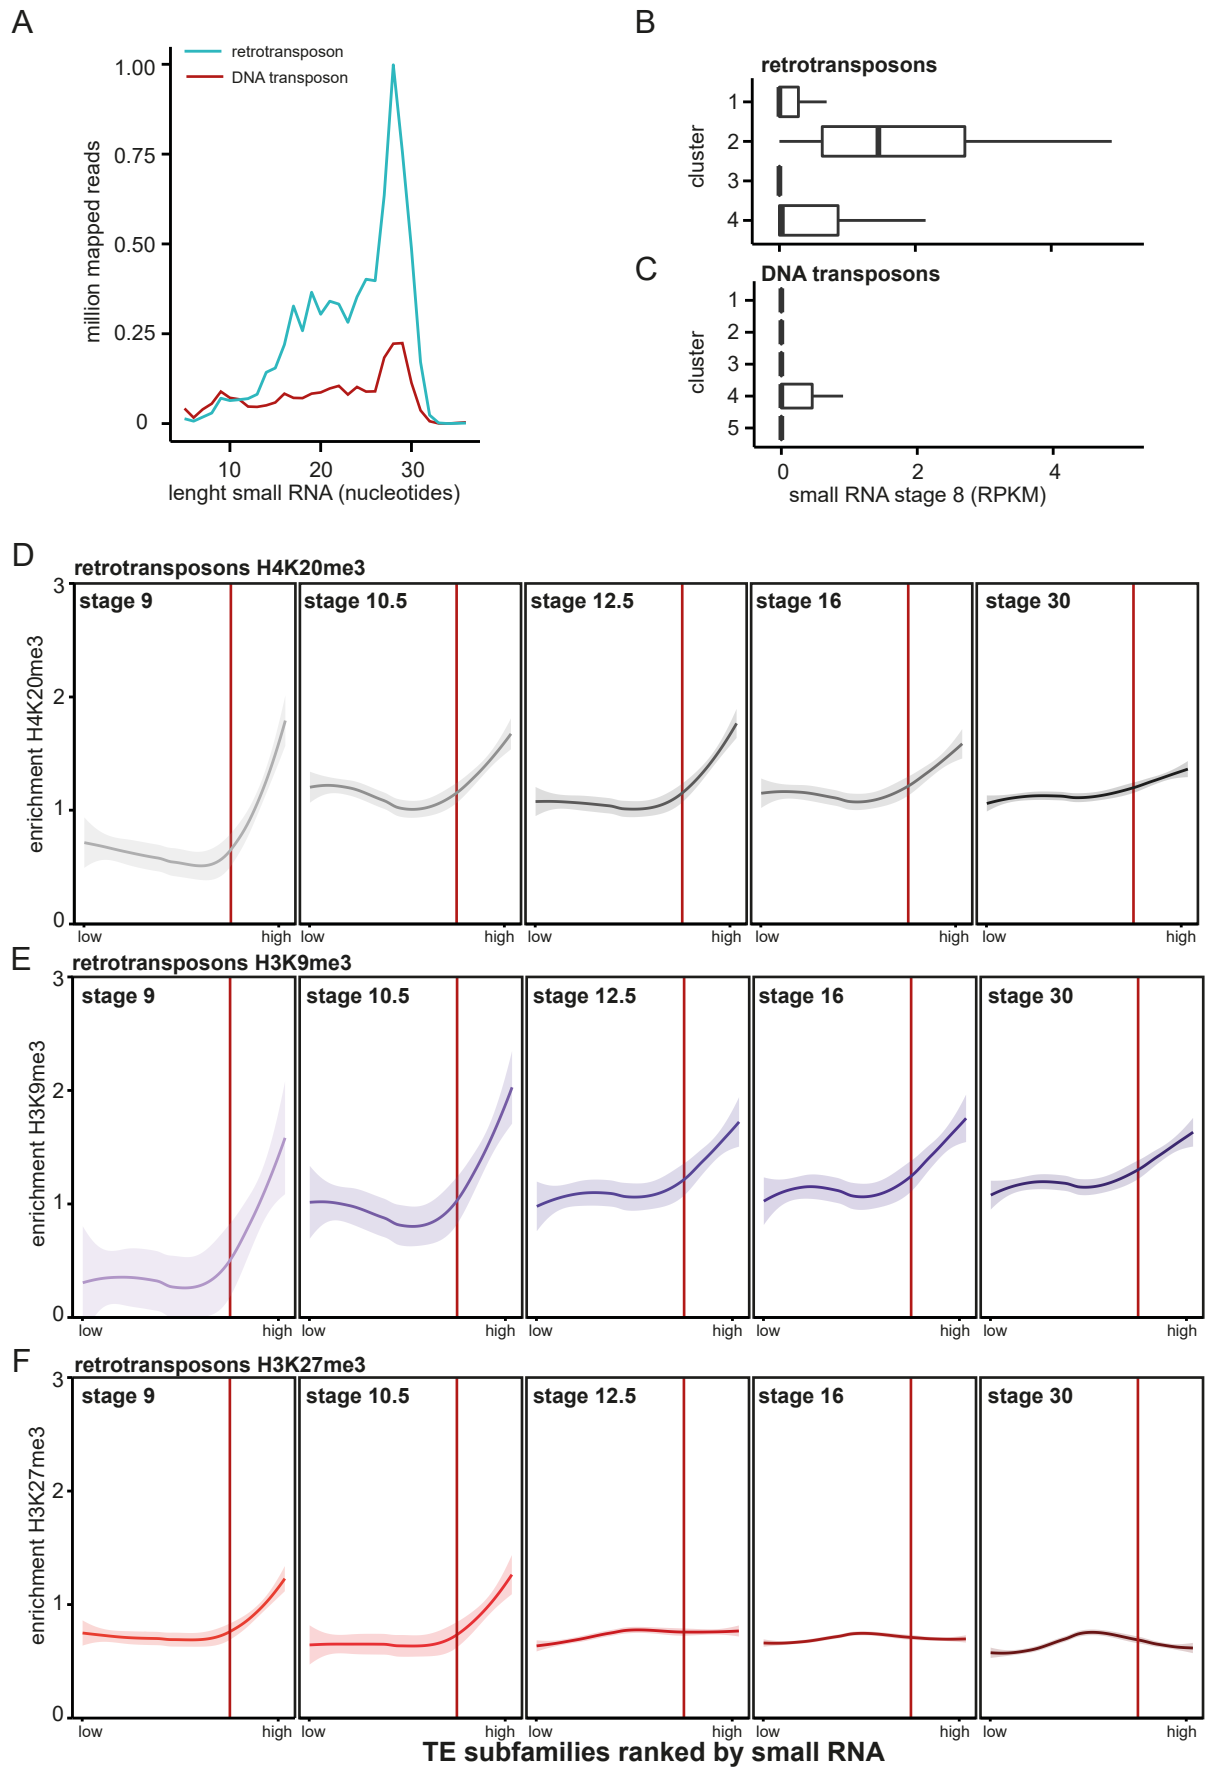

Figure 5

A

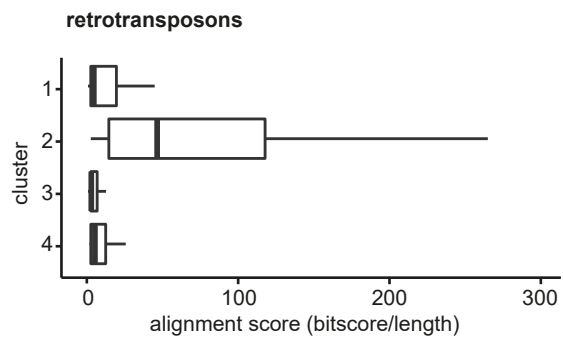

B

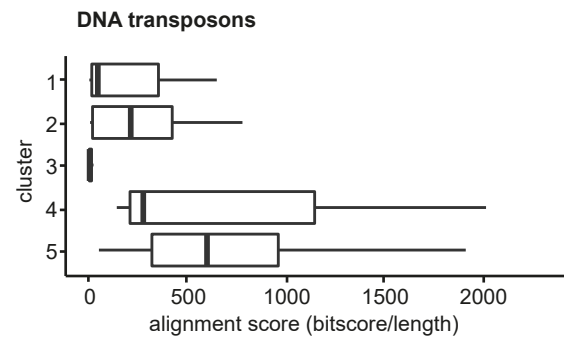

Supplement: NIHMS816953-supplement-1.pdf [file NIHMS816953-supplement-1.pdf]
